# Supplementary material
Source: publisher site journal article supplement (https://www.spandidos-publications.com/2025/downloadSupplementary)

Figure S1. mRNA expression of Notch3 in the brain tissue of control and hypertensive rats. Ang, angiotensin; siRNA, small interfering RNA; cav-1, caveolin-1.

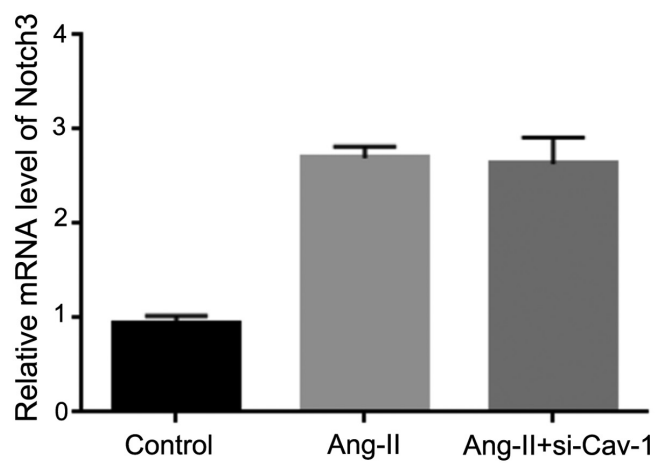

Supplement: Supplementary file 1 [file downloadSupplementary]
